# Supplementary material
Source: publisher figshare collection journal article supplement (https://frontiersin.figshare.com/ndownloader/files/25347542)
Supplement: Supplementary file [file 25347542]

## Supplementary Figure 1 | Graphical representation of the newly detected satellite repeats

A)

Satellite CL229  
(46 bp monomer)

Satellite CL217  
(126 bp monomer)

Satellite CL201  
(172 bp monomer)

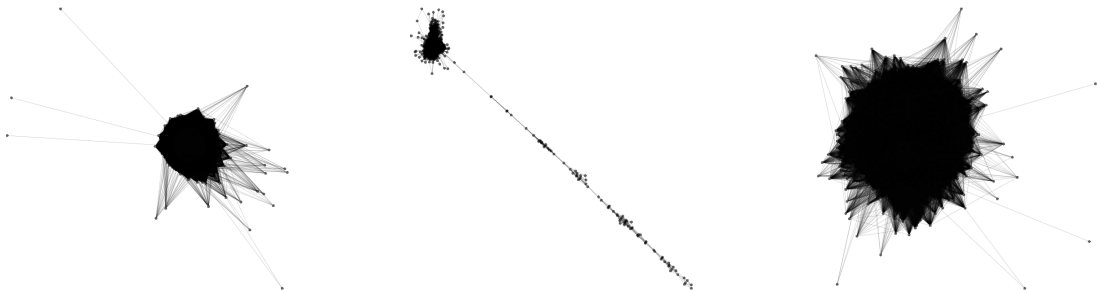

B)

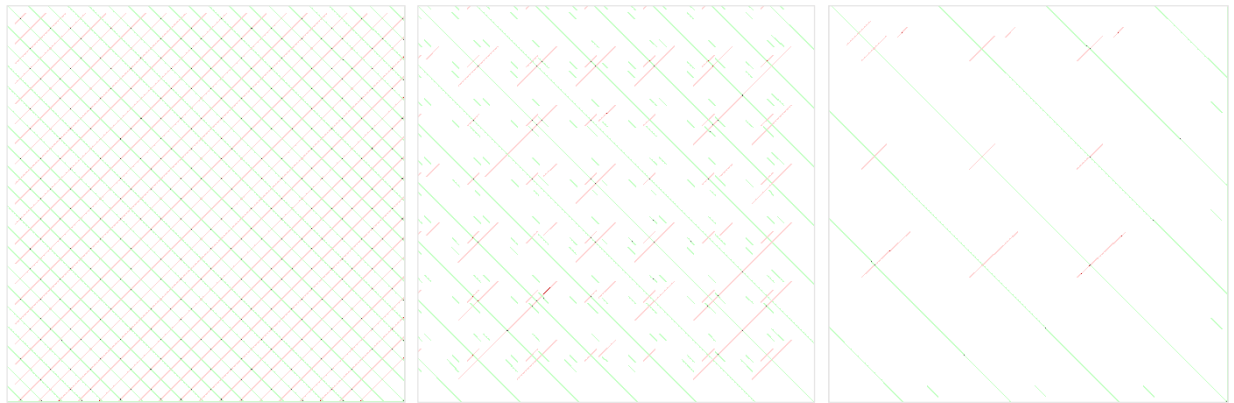

A) RepeatExplorer graph layouts of the respective clusters showing a circular shape, typical for tandem repeats. B) Self-similarity dot-plots of the cluster contigs created by the YASS genomic similarity search tool. The tandemly repeated motifs are displayed as green, parallel, diagonal lines, while the distance between lines equals lengths of the motifs. The red lines perpendicular to the main diagonal lines indicate inverted repeats.
